# Supplementary material for: AON-Mediated Exon Skipping to Bypass Protein Truncation in Retinal Dystrophies Due to the Recurrent CEP290 c.4723A > T Mutation. Fact or Fiction?
Source: PubMed Central journal article supplement (PMC6562928; doi:10.3390/genes10050368), 2019-05-14
Supplement: genes-10-00368-s001.pdf [file genes-10-00368-s001.pdf]

|                                   |                 |         |          |         |           |           |         |          |       |
|-----------------------------------|-----------------|---------|----------|---------|-----------|-----------|---------|----------|-------|
| <b>Isolated_LCA</b>               | AIPL1           | ALMS1   | C2ORF71  | C8ORF37 | CABP4     | CCT2      | CEP290  | CLUAP1   |       |
|                                   | CNGA3           | CNGB3   | CRB1     | CRX     | CWC27     | CYP1A1    | CYP4V2  | GUCY2D   |       |
|                                   | IFT140          | IMPDH1  | IQCB1    | KCNJ13  | KCNV2     | KRT12     | LCA5    | LRAT     |       |
|                                   | MERTK           | MPDZ    | NMNAT1   | NR2E3   | OFD1      | OTX2      | PDE6G   | PRPH2    |       |
|                                   | RD3             | RDH12   | RPE65    | RPGRIP1 | SPATA7    | TULP1     |         |          |       |
| <b>Syndromic_LCA</b>              | AHI1            | ALMS1   | ARL13B   | C21ORF2 | C5ORF42   | CC2D2A    | CEP104  | CEP164   |       |
|                                   | CEP290          | CEP41   | CSPP1    | IFT140  | INPP5E    | INVS      | IQCB1   | KIF7     |       |
|                                   | LCA5            | NPHP1   | NPHP3    | NPHP4   | POC1B     | RPGRIP1L  | SDCCAG8 | TMEM138  |       |
|                                   | TMEM216         | TMEM237 | TTC8     | TUBB4B  | VPS13B    | WDR19     | ZNF423  |          |       |
|                                   |                 |         |          |         |           |           |         |          |       |
| <b>Differential_Diagnosis_LCA</b> | ATF6            | CACNA1F | CACNA1F  | CCT2    | CLN1/PPT1 | CLN2/TPP1 | CLN3    | CLUAP1   |       |
|                                   | CNGA3           | CNGB3   | GNAT1    | GNAT2   | GPR179    | GRM6      | LRIT3   | NYX      |       |
|                                   | PDE6C           | PDE6H   | PRPH2    | SLC24A1 | SLC38A8   | TRPM1     |         |          |       |
| <b>Rod_Cone</b>                   | ABCA4           | ABHD12  | ADIPOR1  | AGBL5   | AHI1      | ARL2BP    | ARL6    | BBS1     |       |
|                                   | BBS2            | BBS5    | BBS12    | BEST1   | C2ORF71   | C8ORF37   | C21ORF2 | CA4      |       |
|                                   | CACNA1F         | CC2D2A  | CEP250   | CEP290  | CEP78     | CERKL     | CHM     | CLN3     |       |
|                                   | CLRN1           | CNGA1   | CNGB1    | CRB1    | CRX       | CWC27     | CYP4V2  | DHDDS    |       |
|                                   | DHX38           | EXOSC2  | EYS      | FAM161A | FLVCR1    | FSCN2     | GNAT1   | GNPTG    |       |
|                                   | GPR125          | GUCA1B  | HGSNAT   | HK1     | IDH3A     | IDH3B     | IFT43   | IFT140   |       |
|                                   | IFT172          | IMPDH1  | IMPG2    | IQCB1   | ITM2B     | KIAA1549  | KIZ     | KLHL7    |       |
|                                   | LAMA1           | LRAT    | MAK      | MERTK   | MFRP      | MFSD8     | MPDZ    | NEK2     |       |
|                                   | NEUROD1         | NPHP4   | NR2E3    | NRL     | OFD1      | OPN1SW    | OR2W3   | PCYT1A   |       |
|                                   | PDE6A           | PDE6B   | PDE6G    | PIK3R4  | PITPNM3   | POMGNT1   | PRCD    | PROM1    |       |
|                                   | PRPF3           | PRPF31  | PRPF4    | PRPF6   | PRPF8     | PRPH2     | RBP3    | RCBTB1   |       |
|                                   | RDH11           | RDH12   | REEP6    | RGR     | RHO       | RIMS1     | RIMS2   | RLBP1    |       |
|                                   | ROM1            | RP1     | RP1L1    | RP2     | RP9       | RPE65     | RPGR    | RPGRIP1  |       |
|                                   | SAG             | SEMA4A  | SLC7A14  | SLC24A1 | SNRNP200  | SPATA7    | SRD5A3  | TOPORS   |       |
|                                   | TTC8            | TLL5    | TTPA     | TUB     | TULP1     | USH2A     | WDR19   | ZNF408   |       |
|                                   | ZNF513          |         |          |         |           |           |         |          |       |
|                                   | <b>Cone_Rod</b> | ABCA4   | ABHD12   | ACBD5   | ADAMTS18  | ADAM9     | AIPL1   | ALMS1    | ATF6  |
|                                   |                 | BBS1    | BBS5     | C2ORF71 | C8ORF37   | C21ORF2   | CABP4   | CACNA2D4 | CDHR1 |
|                                   |                 | CEP78   | CERKL    | CNGA3   | CNGB3     | CNNM4     | CRX     | FAM161A  | GNAT2 |
|                                   |                 | GUCA1A  | GUCY2D   | KCNV2   | LCA5      | NMNAT1    | NR2E3   | PCYT1A   | PDE6C |
| PDE6H                             |                 | PITPNM3 | POC1B    | PROM1   | PRPH2     | RAB28     | RASSF8  | RAX2     |       |
| RDH5                              |                 | RDH12   | RIMS1    | RIMS2   | RPE65     | RPGR      | RPGRIP1 | SEMA4A   |       |
| SPATA7                            |                 | SRD5A3  | TLL5     | TULP1   | UNC119    | USH2A     |         |          |       |
|                                   |                 |         |          |         |           |           |         |          |       |
|                                   |                 |         |          |         |           |           |         |          |       |
|                                   |                 |         |          |         |           |           |         |          |       |
| <b>Macular_Dystrophy</b>          | ABCA4           | ATXN7   | BEST1    | C1QTNF5 | CDH3      | CNGA3     | CRB1    | DRAM2    |       |
|                                   | EFEMP1          | ELOVL4  | FSCN2    | GUCA1A  | GUCA1B    | IMPG1     | IMPG2   | MFSD8    |       |
|                                   | PROM1           | PRPH2   | RLBP1    | RP1L1   | RPGR      | TIMP3     |         |          |       |
| <b>Achromatopsia</b>              | ATF6            | CACNA1F | CLUAP1   | CNGA3   | CNGB3     | GNAT2     | NDP     | PDE6C    |       |
|                                   | PDE6H           |         |          |         |           |           |         |          |       |
| <b>Dyschromatopsies</b>           | OPN1LW          | OPN1MW  | OPN1SW   |         |           |           |         |          |       |
| <b>CSNB</b>                       | CABP4           | CACNA1F | GNAT1    | GNB3    | GRK1      | GPR179    | GRM6    | HK1      |       |
|                                   | LRIT3           | NYX     | PDE6B    | RHO     | SAG       | SLC24A1   | TRPM1   |          |       |
| <b>RS</b>                         | RS1             | CRB1    |          |         |           |           |         |          |       |
| <b>Choroideremia</b>              | CHM             |         |          |         |           |           |         |          |       |
| <b>Others</b>                     | PAX2            | RBP4    | GPATCH11 |         |           |           |         |          |       |

**Figure S1.** Panel of 199 genes involved in retinal dystrophies. LCA: Leber congenital amaurosis; CSNB: congenital stationary night blindness; RS: retinoschisis.

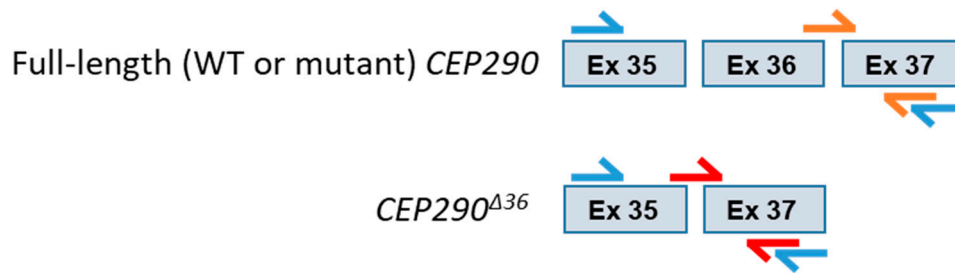

**Figure S2.** Localization of primers used to amplify the full-length and *CEP290* mRNAs lacking exon 36. In blue, RT-PCR primer pairs used to amplify the full-length and skipped *CEP290* transcripts. In orange, RT-qPCR primer pairs used to amplify the full-length (wild-type, WT or Mutant) *CEP290* transcript. In red, RT-qPCR primer pairs used to amplify the *CEP290* transcript deleted of exon 36 (*CEP290*<sup>Δ36</sup>), respectively.

**Table S1.** Sequences and positions of sequencing primers.

| Targeted region       | Couple         | Position  | Sequence (5'>3')      |
|-----------------------|----------------|-----------|-----------------------|
| <i>CEP290</i> Exon 36 | <i>forward</i> | Intron 35 | ACAATTTAAGATATAGTTTCG |
|                       | <i>reverse</i> | Intron 36 | AACAAAAAGGGTAACTTC    |

**Table S2.** Genetic and clinical features of individuals.

| Individual | Cell line | Gender | Age* (years) | <i>CEP290</i> mutations                          | Ocular phenotype   |
|------------|-----------|--------|--------------|--------------------------------------------------|--------------------|
| Control 1  | C1        | Female | 8            | None                                             | No overt pathology |
| Control 2  | C2        | Male   | 10           | None                                             | No overt pathology |
| Control 3  | C3        | Female | 13           | None                                             | No overt pathology |
| Patient 1  | P1        | Male   | 34           | c.4723A>T (p.Lys1575*)<br>c.4723A>T (p.Lys1575*) | <i>EOSRD</i>       |
| Patient 2  | P2        | Male   | 24           | c.4723A>T (p.Lys1575*)<br>c.4723A>T (p.Lys1575*) | <i>LCA</i>         |

EOSRD: Early onset and severe retinal dystrophy; LCA: Leber congenital amaurosis

\*age at which the dermal biopsy and the last clinical examination were performed.

**Table S3.** Sequences and positions of RT-PCR primers.

| Targeted region       | Couple         | Position | Sequence (5'>3')        |
|-----------------------|----------------|----------|-------------------------|
| <i>CEP290</i> Exon 36 | <i>forward</i> | Exon 35  | CCACTGCAGAAAGAGAAAAGC   |
|                       | <i>reverse</i> | Exon 37  | TTAGTTTGACCAAGAGTGAGGAA |

**Table S4.** Sequences and positions of RT-qPCR primers. "Full-length" refers to the wild-type or mutant *CEP290* transcript, whereas *CEP290*<sup>Δ36</sup> refers to *CEP290* transcript deleted of exon 36.

| Targeted region                            | Couple         | Position                 | Sequence (5'>3')          |
|--------------------------------------------|----------------|--------------------------|---------------------------|
| « full-length »<br><i>CEP290</i> (exon 36) | <i>forward</i> | Jonction exon 36/exon 37 | AACAAACGGCTTGGGATTTAATGA  |
|                                            | <i>reverse</i> | Exon 37                  | TTTGACCAAGAGTGAGGAAAGAGA  |
| <i>CEP290</i> <sup>Δ36</sup>               | <i>forward</i> | Jonction exon 35/exon 37 | AAAGCCAGAGAGGATTTAATGAAAC |
|                                            | <i>reverse</i> | Exon 37                  | TTGACCAAGAGTGAGGAAAGAG    |
